# Supplementary material for: Atmospheric sink of β-ocimene and camphene initiated by Cl atoms: kinetics and products at NOxfree-air
Source: Royal Society of Chemistry journal article supplement (doi:10.1039/c8ra04931a), 2018-01-01
Supplement: c8ra04931a1.pdf [file c8ra04931a1.pdf]

## SUPPLEMENTARY INFORMATION

### Atmospheric sink of $\beta$ -ocimene and camphene initiated by Cl atoms: kinetics and products at $\text{NO}_x$ free-air

Elizabeth Gaona-Colmán<sup>a</sup>, María B. Blanco<sup>a\*</sup>, Ian Barnes<sup>b</sup>, Peter Wiesen<sup>b</sup>, Mariano A. Teruel<sup>a\*</sup>

<sup>a</sup>Instituto de Investigaciones en Físicoquímicas de Córdoba (INFIQC). Dpto.deFísicoquímica, Facultad de CienciasQuímicas,

Universidad Nacional de Córdoba. Ciudad Universitaria, 5000 Córdoba, Argentina. E-mails: [mteruel@fcq.unc.edu.ar](mailto:mteruel@fcq.unc.edu.ar); [mblanco@fcq.unc.edu.ar](mailto:mblanco@fcq.unc.edu.ar); Tel.: +54-351-4334169; Fax: +54-351-4334180.

<sup>b</sup>PhysikalischeChemie/FBC, BergischeUniversitaet Wuppertal, 42119 Wuppertal, Germany

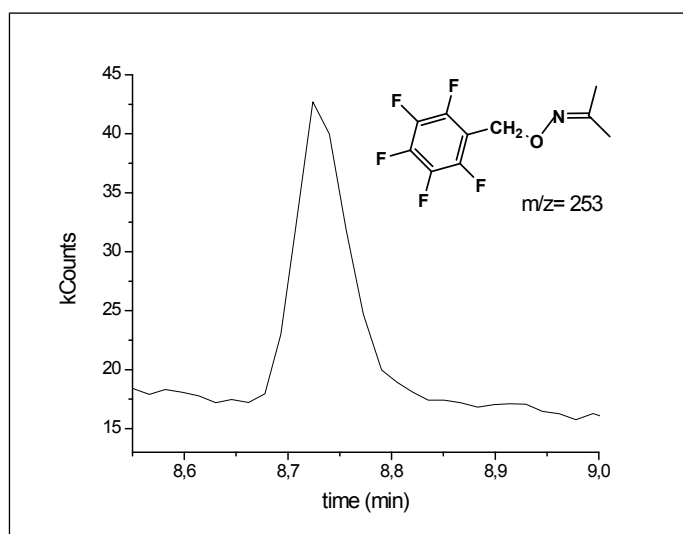

**Figure S1a:**GC chromatogram of acetoxime formed due to reaction of  $\beta$ -ocimene and Cl atoms in air at 298 K and atmospheric pressure

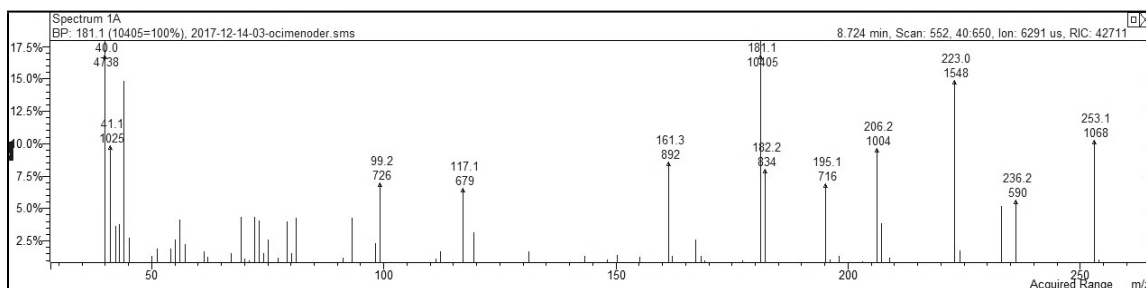

**Figure S1b:**Mass spectrum of acetoxime formed during reaction of  $\beta$ -ocimene and Cl atoms in air at 298 K and atmospheric pressure.

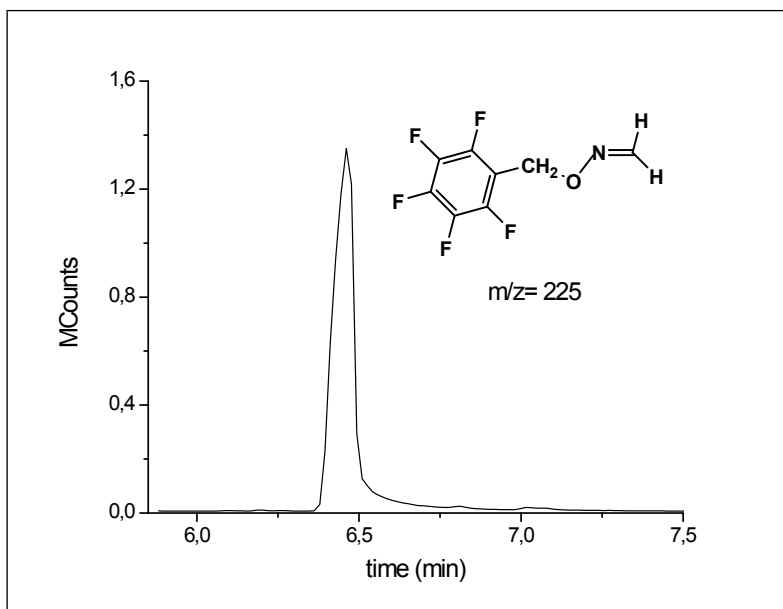

**Figure S2a:**GC chromatogram of formaldoxime formed during the reaction of camphene with Cl atoms in air at 298 K and atmospheric pressure

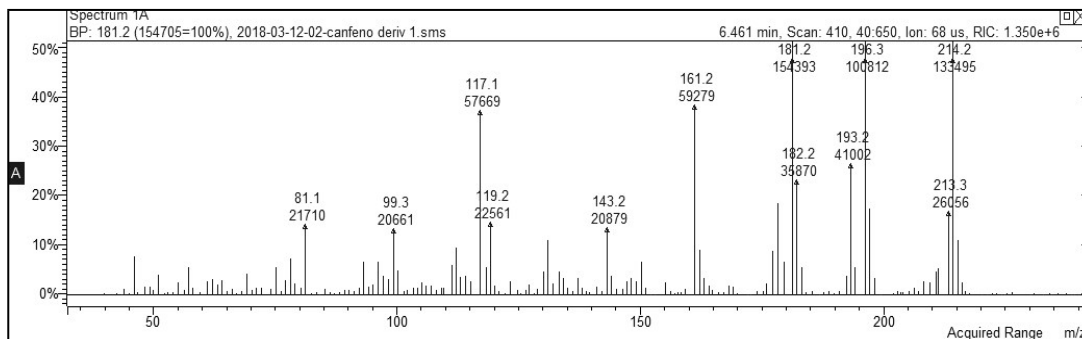

**Figure S2b:**Mass spectrum of formaldoxime formed during the reaction of camphene with Cl atoms in air at 298 K and atmospheric pressure

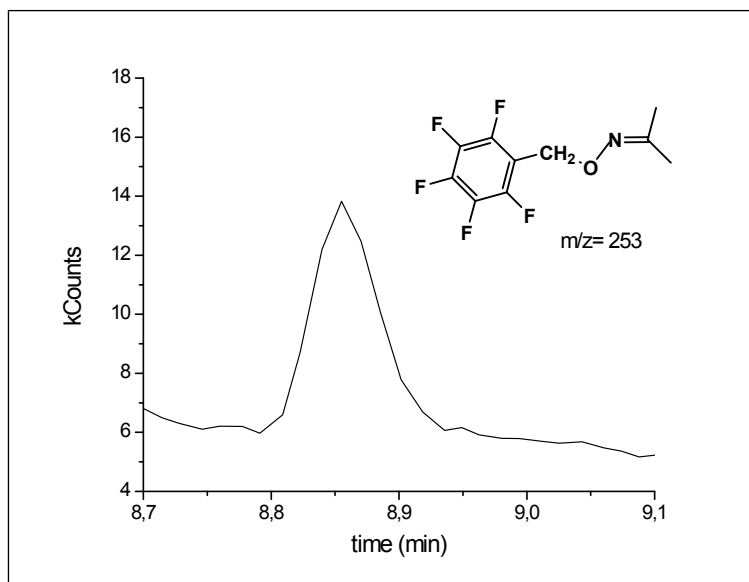

**Figure S3a:**GC chromatogram of acetoxime formed during the reaction of camphene and Cl atoms in air at 298 K and atmospheric pressure.

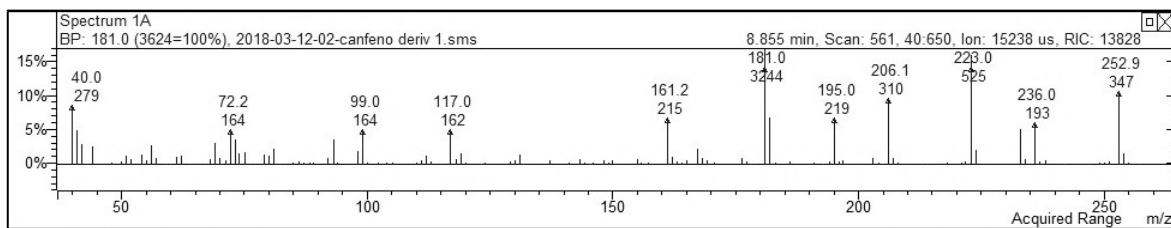

**Figure S3b:**Mass spectrum of acetoxime formed during reaction of camphene and Cl atoms in air at 298 K and atmospheric pressure.
